# Supplementary material for: Innovative or Inadequate? Assessing Human Resource Job Training Methods among Senior Administrative Staff in UDS
Source: Research Square preprint supplement (doi:10.21203/rs.3.rs-7180046/v1), 2025-10-20
Supplement: Supplementary file 1 [file dbc74d2f4ef034597d722912.docx]

**Title of the Manuscript**
**Innovative or Inadequate? Assessing Human Resource Job Training Methods among Senior Administrative Staff in UDS**

**Author(s):**

Dr Kingsley Agyei-Sarpong

Guidance and Counselling Directorate

Tamale Technical University, Tamale, Ghana

Email: [k.agyei-sarpong@stu.ucc.edu.gh](mailto:k.agyei-sarpong@stu.ucc.edu.gh)

ORCID ID: 0000000194032668

Phone: +233 244715660

**Co-Author(s):**

Lorna Zaratu Adam

Office of the Principal, Nyankpala Campus

University for Development Studies, Tamale, Ghana

Email: [lornazaratu2@gmail.com](mailto:lornazaratu2@gmail.com)

**Corresponding Author:**

Dr Kingsley Agyei-Sarpong

Email: [k.agyei-sarpong@stu.ucc.edu.gh](mailto:k.agyei-sarpong@stu.ucc.edu.gh)

ORCID ID: 0000000194032668

Phone: +233 244715660

**Author Contributions**

Lorna Zaratu Adam conceived the study and collected the data.

Dr Kingsley Agyei-Sarpong did the analysis, wrote the initial draft, reviewed, and revised the manuscript for intellectual content.

**Date of Submission**
July 12, 2025

**Manuscript Word Count: 5019**

**Funding**
This research received no specific grant from any funding agency in the public, commercial, or not-for-profit sectors.

**Conflicts of Interest**
The authors declare no conflicts of interest.

**Ethical Authorisation**

Ethical approval for this research was secured from the Research and Ethics Committee of the University for Development Studies. Participation was optional, and all participants granted informed consent prior to completing the survey. Data confidentiality and anonymity were rigorously upheld throughout the investigation.
